# Supplementary material for: Signal Transduction and the Cytoskeleton
Source: MDPI journal article supplement (doi:10.3390/jcm11154316), 2000-01-01
Supplement: s1 [file s1]

**Supplementary Table S1. Treatment of SLE patients included in the study**

|                            | No. patients (%) |
|----------------------------|------------------|
| SLE treatment              |                  |
| Glucocorticoids            | 12 (30.0%)       |
| Hydroxychloroquine         | 32 (80.0%)       |
| Methotrexate               | 16 (40.0%)       |
| Cyclosporin A              | 1 (2.5%)         |
| Azathioprine               | 6 (15.0%)        |
| Mycophenolate              | 5 (12.5%)        |
| Leflunomide                | 2 (5.0%)         |
| Belimumab                  | 9 (22.5%)        |
| Treatment of comorbidities |                  |
| Antihypertensives          | 6 (15.0%)        |
| $\beta$ -blocker           | 4 (10.0%)        |
| Lipid lowering agent       | 6 (15.0%)        |
| Antiplatelet/anticoagulant | 3 (7.5%)         |
| Biphosphonate              | 5 (12.5%)        |
| Antidepressant             | 13 (32.5%)       |
| Anxiolytic                 | 4 (10.0%)        |

**Supplementary Table S2. Longitudinal changes in anxiety and depression in SLE patients who achieved or not a state of low disease activity**

|                           |        | Baseline <sup>1</sup> | Follow-up <sup>1</sup> | P value <sup>2</sup> |
|---------------------------|--------|-----------------------|------------------------|----------------------|
| <b>LLDAS <sup>3</sup></b> |        |                       |                        |                      |
| No (n=16)                 | HADS-A | 13 (8)                | 11 (4)                 | 0.637                |
|                           | HADS-D | 8 (5)                 | 8 (4)                  | 0.916                |
| Yes (n=24)                | HADS-A | 10 (6)                | 10 (6)                 | 0.834                |
|                           | HADS-D | 8 (6)                 | 9 (7)                  | 0.303                |
| <b>LDA <sup>4</sup></b>   |        |                       |                        |                      |
| No (n=32)                 | HADS-A | 11 (8)                | 11 (6)                 | 0.444                |
|                           | HADS-D | 9 (6)                 | 8 (5)                  | 0.973                |
| Yes (n=8)                 | HADS-A | 10 (8)                | 10 (6)                 | 0.235                |
|                           | HADS-D | 7 (3)                 | 6 (7)                  | 0.128                |

<sup>1</sup> Presented as median (interquartile range)

<sup>2</sup> Wilcoxon Signed Rank Test

<sup>3</sup> LLDAS, low disease activity state defined according to Franklyn *et al.*[1]

<sup>4</sup> LDA, low disease activity defined according to Polachek *et al.*[2]

**Supplementary Table S3. Reclassification of the anxiety and depression level in association with longitudinal change in disease activity in SLE patients**

|                  | Group    | No. patients | Change in SLEDAI-2K <sup>1</sup> | P value <sup>2</sup> |
|------------------|----------|--------------|----------------------------------|----------------------|
| Anxiety level    | Improved | 9            | -5 (6)                           | 0.262                |
|                  | Stable   | 18           | -2 (2)                           |                      |
|                  | Worsened | 13           | -2 (4)                           |                      |
| Depression level | Improved | 9            | 0 (2)                            | 0.269                |
|                  | Stable   | 24           | -2 (4)                           |                      |
|                  | Worsened | 7            | -3 (4)                           |                      |

<sup>1</sup>Median (interquartile range); <sup>2</sup>Kruskal-Wallis test (comparison across the three groups)

**Supplementary Table S4. Anxiety and depression in association with sociodemographic and clinical characteristics of SLE patients**

|                                   | HADS-A<br><11 <sup>1</sup> | HADS-A<br>≥11 <sup>2</sup> | P value <sup>3</sup> | HADS-D<br><8 <sup>1</sup> | HADS-D<br>≥8 <sup>2</sup> | P value <sup>3</sup> |
|-----------------------------------|----------------------------|----------------------------|----------------------|---------------------------|---------------------------|----------------------|
| Age (years) <sup>4</sup>          | 48.9 (10.0)                | 51.9 (10.6)                | 0.363                | 49.9 (9.8)                | 51.2 (11.2)               | 0.684                |
| SLE duration (years) <sup>4</sup> | 8.7 (6.8)                  | 11.6 (7.1)                 | 0.200                | 8.9 (6.5)                 | 11.9 (7.5)                | 0.186                |
| SLEDAI-2K <sup>5</sup>            | 6.0 (4.0)                  | 6.0 (4.0)                  | 0.745                | 6.0 (4.0)                 | 6.0 (4.0)                 | 0.649                |
| No. comorbidities <sup>5</sup>    | 1.0 (2.0)                  | 2.0 (3.0)                  | 0.290                | 1.0 (3.0)                 | 1.0 (2.0)                 | 0.668                |
| Organ damage (SDI) <sup>5</sup>   | 0.0 (1.0)                  | 1.0 (1.0)                  | 0.498                | 0.0 (1.0)                 | 0.0 (1.0)                 | 0.957                |
| Gender (female) <sup>6</sup>      | 94.7%                      | 100.0%                     | 0.475                | 95.5%                     | 100.0%                    | 1.000                |
| Education level <sup>6</sup>      |                            |                            |                      |                           |                           |                      |
| Primary                           | 11.2%                      | 19.0%                      | 0.548                | 9.5%                      | 22.4%                     | 0.440                |
| Secondary                         | 44.4%                      | 52.4%                      |                      | 47.6%                     | 50.0%                     |                      |
| Higher/tertiary                   | 44.4%                      | 28.6%                      |                      | 42.9%                     | 27.8%                     |                      |
| Working (yes) <sup>6</sup>        | 73.7%                      | 33.3%                      | 0.011                | 68.2%                     | 33.3%                     | 0.028                |

<sup>1</sup>n=19; <sup>2</sup>n=21; <sup>3</sup> Independent samples t-test (for normally distributed data) or Mann-Whitney test (for ordinal-type or non-normally distributed data); <sup>4</sup>Data are presented as mean (standard deviation); <sup>5</sup> Data are presented as median (interquartile range); <sup>6</sup> Data are presented as frequencies (percentages)

1. Franklyn, K.; Lau, C.S.; Navarra, S.V.; Louthrenoo, W.; Lateef, A.; Hamijoyo, L.; Wahono, C.S.; Chen, S.L.; Jin, O.; Morton, S.; et al. Definition and initial validation of a Lupus Low Disease Activity State (LLDAS). *Ann Rheum Dis* **2016**, *75*, 1615-1621, doi:10.1136/annrheumdis-2015-207726.
2. Polachek, A.; Gladman, D.D.; Su, J.; Urowitz, M.B. Defining Low Disease Activity in Systemic Lupus Erythematosus. *Arthritis Care Res (Hoboken)* **2017**, *69*, 997-1003, doi:10.1002/acr.23109.
